# Supplementary material
Source: ML conference proceedings conference paper supplement (https://openreview.net/forum?id=j0p8ASp9Br)
Supplement: supplementary_material [file attachment]

# REAL-TIME UNCERTAINTY DECOMPOSITION FOR ONLINE LEARNING CONTROL SUPPLEMENTARY MATERIAL

**Anonymous authors**

Paper under double-blind review

This document provides supplementary information for the ICRL 2021 submission.

Table 1: Evaluation time in seconds

|         | 1D_centered | 1D_split | 2D_square | 2D_gaussian | pmsm_temperature | sarcos     |
|---------|-------------|----------|-----------|-------------|------------------|------------|
| GPmodel | 0.004984    | 0.004733 | 0.005563  | 0.083960    | 1.499310         | 6.770838   |
| BNN     | 4.229852    | 4.257875 | 11.048753 | 20.556395   | 60.889223        | 121.837305 |
| Dropout | 2.660853    | 2.649146 | 7.388201  | 13.246666   | 38.791683        | 77.995343  |
| EpiOut  | 0.121921    | 0.094260 | 0.107400  | 0.215205    | 0.491637         | 0.894823   |

Table 2: Training time seconds

|         | 1D_centered | 1D_split   | 2D_square | 2D_gaussian | pmsm_temperature | sarcos       |
|---------|-------------|------------|-----------|-------------|------------------|--------------|
| GPmodel | 0.221481    | 0.231211   | 0.234307  | 11.773749   | 545.812856       | 13845.742551 |
| BNN     | 102.226074  | 103.123688 | 47.040921 | 456.007891  | 2222.078883      | 4415.747424  |
| Dropout | 3.485833    | 3.519852   | 1.646240  | 15.074952   | 72.355323        | 144.469012   |
| EpiOut  | 20.289957   | 18.967542  | 13.004467 | 146.365084  | 2483.204981      | 12475.670199 |

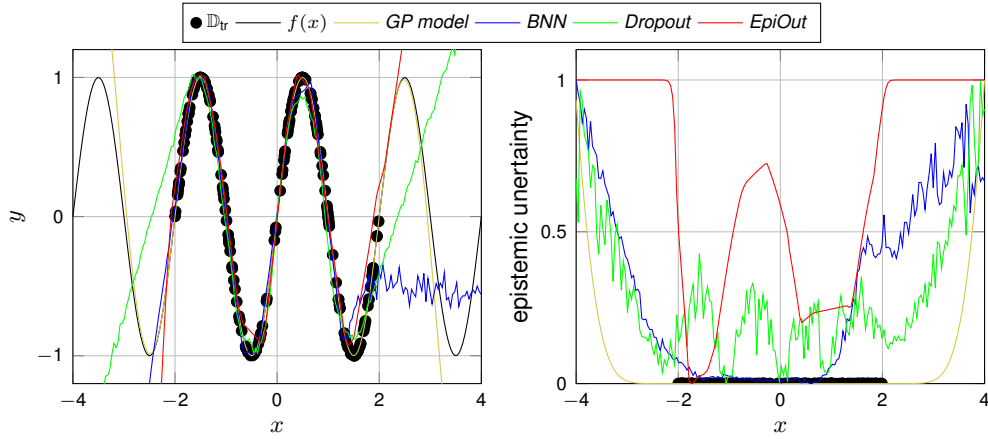

Figure 1: The point estimate (mean prediction) for the different models along with the training data *1D centered* and the true underlying function  $f(x) = \sin(\pi x)$  are shown on the left. The right plot shows the epistemic uncertainty estimate.

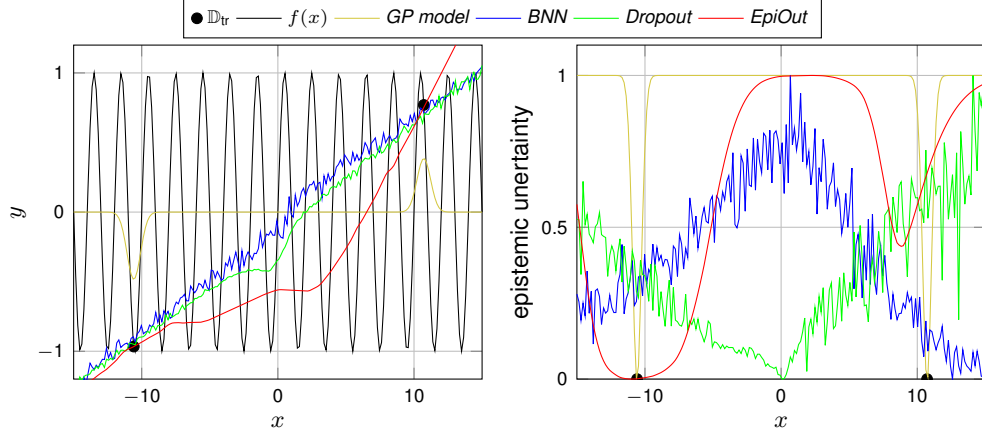

Figure 2: The point estimate (mean prediction) for the different models along with the training data  $ID$  sparse and the true underlying function  $f(x) = \sin(\pi x)$  are shown on the left. The right plot shows the epistemic uncertainty estimate.

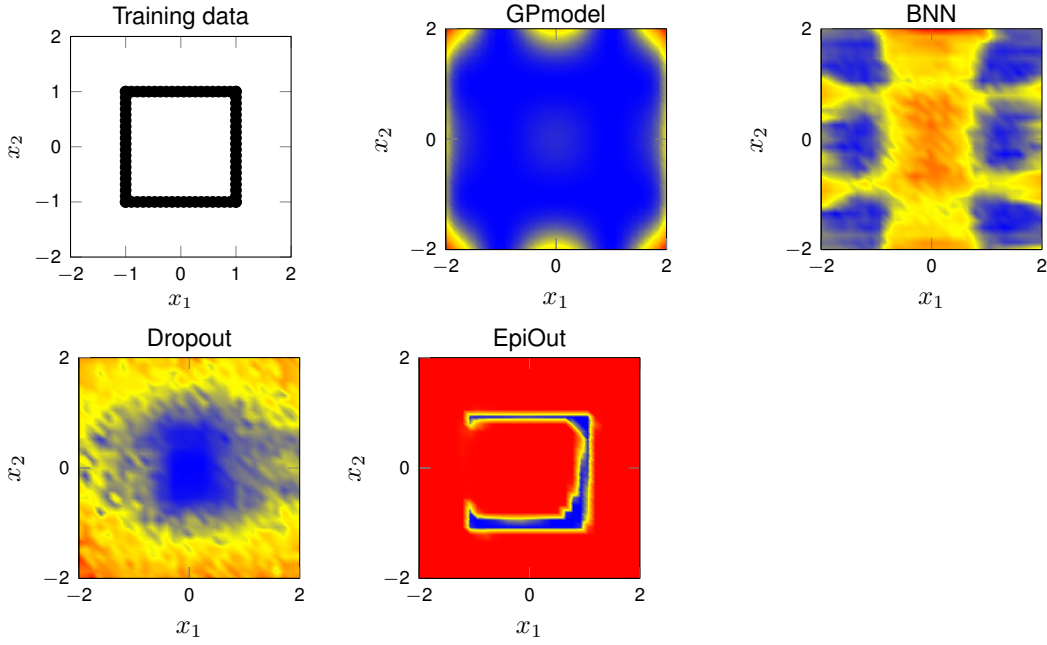

Figure 3: The training data and the predicted epistemic uncertainty by the considered models on the 2D square data set.

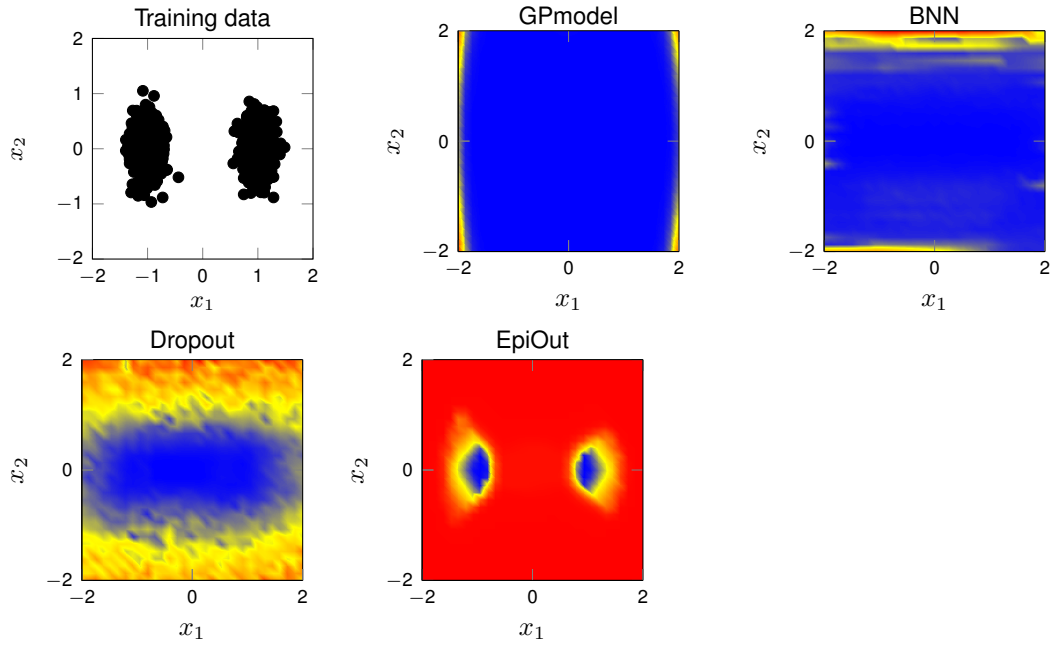

Figure 4: The training data and the predicted epistemic uncertainty by the considered models on the 2D Gaussian data set.

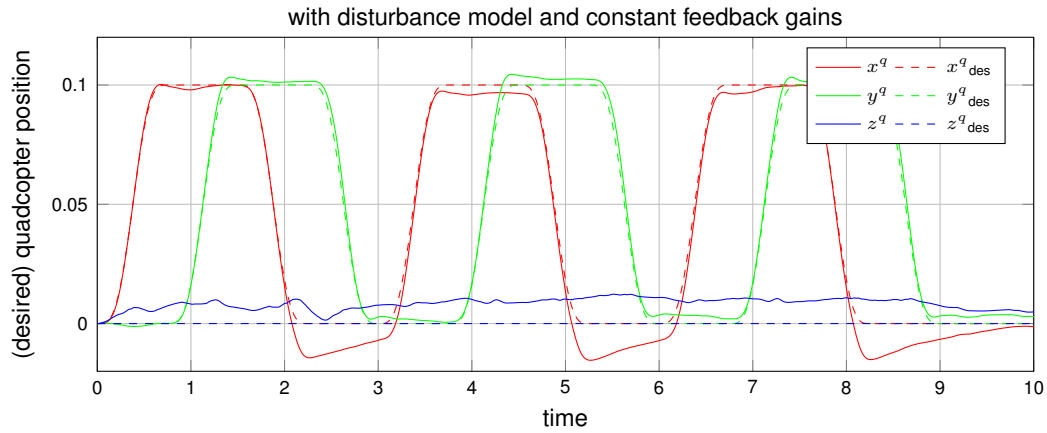

Figure 5: The tracking performance of the quadcopter with disturbance model but constant gains  $\beta = 0$  shows an increased tracking error of 0.00944 (vs 0.00733).

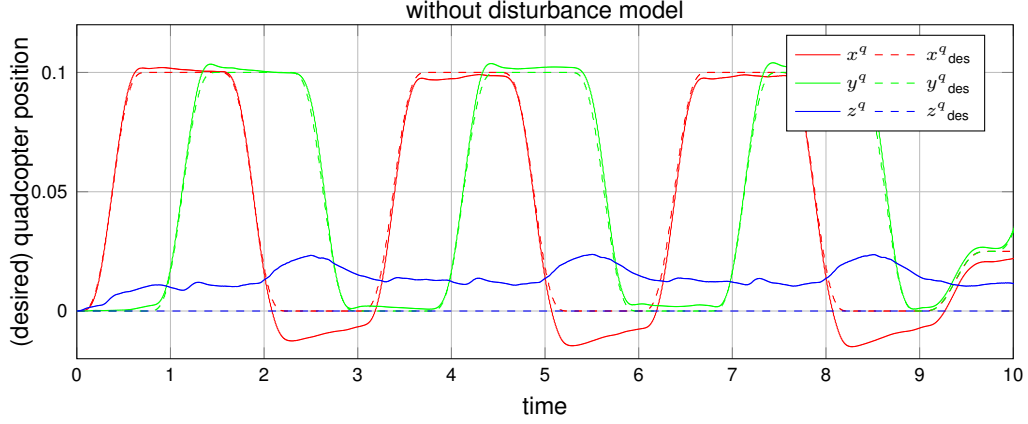

Figure 6: The tracking performance of the quadcopter without disturbance model. It is clearly visible, that the tracking error is larger (RMSE is 0.0153) than with the disturbance model.

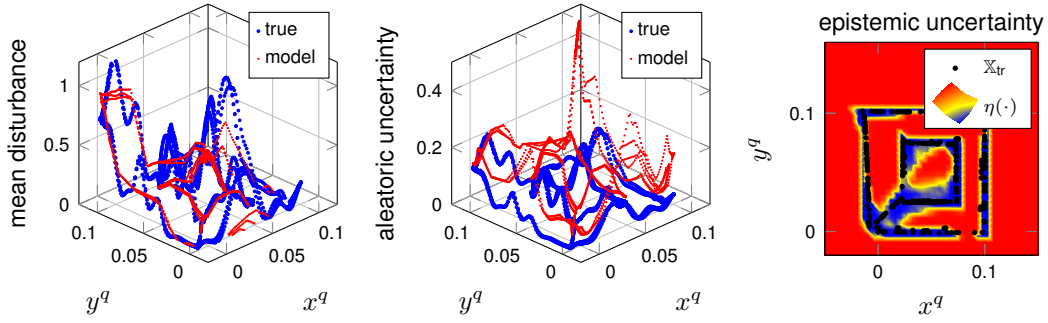

Figure 7: The mean disturbance model (left) captures most of the thermals, and the aleatoric uncertainty (middle) is slightly overestimated by the model. The “true” values are obtained from 1000 samples of the disturbance. The epistemic uncertainty (right) shows that the model is only confident close to the desired trajectory.

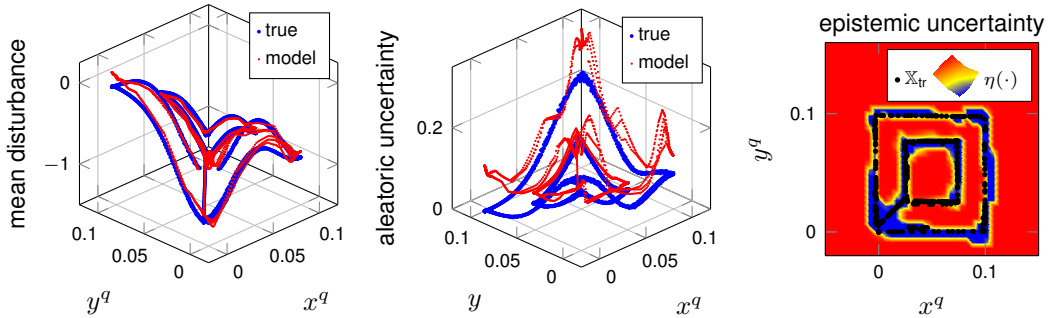

Figure 8: Results for a synthetic disturbance composed of Gaussians.
